## Proteins required for vacuolar function are targets of lysine polyphosphorylation in yeast

Liam McCarthy<sup>1,2,3</sup>, Amanda Bentley-DeSousa<sup>1,2,3</sup>, Alix Denoncourt<sup>1,2</sup>, Yi-Chieh Tseng<sup>1,2</sup>,  
Matthew Gabriel<sup>1,2</sup>, and Michael Downey<sup>1,2,4</sup>

1. Department of Cellular and Molecular Medicine, University of Ottawa, Ottawa, Ontario, Canada, K1H 8M5
2. Ottawa Institute of Systems Biology, University of Ottawa, Ottawa, Ontario, Canada, K1H 8M5
3. Contributed equally to this work
4. Corresponding author: [mdowne2@uottawa.ca](mailto:mdowne2@uottawa.ca)

**Running Title:** New polyphosphorylation targets in yeast

## **ABSTRACT:**

Polyphosphates (polyP) are long chains of inorganic phosphates that can be attached to lysine residues of target proteins as a non-enzymatic post-translational modification. This modification, termed polyphosphorylation, may be particularly prevalent in bacterial and fungal species that synthesize and store large quantities of polyP. In this study, we applied a proven screening strategy to evaluate the polyphosphorylation status of over 200 candidate targets in the budding yeast *S. cerevisiae*. We report 8 new polyphosphorylated proteins that interact genetically and physically with a previously identified network of targets implicated in ribosome biogenesis. The expanded target network includes vacuolar proteins Prb1 and Apl5, whose modification with polyP suggests a model for feedback regulation of polyP synthesis, while raising additional questions regarding the location of polyphosphorylation *in vivo*.

## **INTRODUCTION:**

Polyphosphate (polyP) is a polymer of inorganic phosphate moieties joined together in linear chains ranging from 3-1000s of residues in length. Evidence suggests that these chains exist in all cells, although their length and concentration vary widely. PolyP is particularly abundant in the budding yeast *S. cerevisiae*, comprising upwards of 10 % of the dry weight of the cell and reaching internal concentrations of over 200 mM in terms of individual phosphate units (1,2). Most of the polyP in yeast is stored in the vacuole following synthesis by the vacuolar membrane-bound VTC complex (3). Overall chain length is controlled by exo- and endophosphatases Ddp1, Ppn1, Ppn2, and Ppx1 (4). In addition to its role in ion homeostasis and phosphate metabolism (5,6), Azevedo *et al.* showed that polyP chains can be non-covalently added to lysine residues as a post-translational modification (PTM) (7). They characterized this modification on proteins Nsr1 and Top1, providing evidence that polyP chains can regulate protein interactions and topoisomerase activity of purified Top1 *in vitro*, as well as the localization of Nrs1 and Top1 *in vivo*. Polyphosphorylation is non-enzymatic and occurs in poly-acidic serine and lysine rich (PASK) motifs (7,8). While the sequence requirements for polyP addition are unclear, lysine residues appear to be the modified site (7,9,10). Consistent with this, mutation of lysine residues within predicted PASK motifs to arginine prevents polyphosphorylation of Nsr1, Top1, and Rpa34 (7,9). Polyphosphorylation causes dramatic electrophoretic shifts when protein extracts are run on denaturing Bis-Tris NuPAGE gels, but this same shift does not occur with traditional SDS-PAGE gels (7,9). The underlying reasons for this difference are not completely clear, although it could be related to the use of TEMED in the polymerization of SDS-PAGE gels (9).

Recently, we reported the identification of an additional 15 polyphosphorylation targets in yeast, including a conserved network implicated in ribosome biogenesis (9). Many of the PASK motifs in these proteins are contained within intrinsically disordered regions that appear to be under evolutionary selection (11). Based on enrichment in ribosome-related functions, we uncovered a novel function for *VTC4*, encoding the catalytic subunit of the VTC complex (12), in polysome assembly (9). We also demonstrated that 6 human proteins, including homologs of our novel yeast targets, could be polyphosphorylated following the ectopic expression of *E. coli* PPK, the bacterial polyP polymerase, in HEK293T cells (9). Subsequent studies using protein microarrays identified an additional 8 human proteins as targets, in addition to 5 proteins that appear to bind polyP chains non-covalently (13). Altogether, work from our group and others suggests that lysine polyphosphorylation has the capacity to be a global protein modifier, akin to other lysine based modifications such as acetylation or ubiquitylation (8,14).

Our previous strategy to identify targets of lysine polyphosphorylation in yeast took advantage of a set of strains wherein each open reading frame is expressed as a fusion with the GFP epitope (15). Candidate fusions from this set were crossed into a wild-type or *vtc4*Δ mutant background prior to analysis by NuPAGE and immunoblotting with an antibody against GFP. In this assay, a *VTC4*-dependent electrophoretic shift signals a candidate polyphosphorylated protein. In our previous work (9), we prioritized 90 targets from 427 proteins containing putative PASK motifs, defined by a sliding window of 20 amino acids with 75 % D, E, S or K amino acids with at least 1 K. This set of 90 proteins was enriched for multiple or long PASK motifs containing many lysine residues. In an attempt to further define the landscape of polyphosphorylation in *S. cerevisiae*, we have now screened the remainder of the candidates present in this GFP collection (See Materials and Methods) using a similar strategy

## **RESULTS & DISCUSSION:**

Using our previously defined screening approach, we have now uncovered an additional 8 candidate targets. As observed in our previous work, the shifts by polyP (i.e. in the presence of a functional *VTC4* gene) are dramatic and quantitative, with the whole population of target proteins being affected (**Figure 1**). We attribute this ‘all or nothing’ pattern to the high concentration of polyP in cells and in extracts following cell lysis, which could be quantitatively modifying proteins *in vitro*. *In vivo*, polyphosphorylation of any given target may be sub-stoichiometric. New polyphosphorylated targets uncovered in our screen include homologs of proteins implicated in human disease (**Figure 1, see below**). Despite the identification of proteins predicted to function in diverse processes, new targets display extensive physical and genetic interactions with previously identified polyphosphorylated proteins (**Figure 2**). Heh2 is an inner nuclear membrane protein involved in ensuring the quality control of nuclear pore complexes (16). Ygr237c and Kel3 are uncharacterized proteins with diverse physical and genetic interactions and putative cytoplasmic localization (9). Itc1 is a member of the Itc1-Isw2 chromatin remodeling complex involved in meiotic gene repression (17). Nop2 is an rRNA methyltransferase required for 27S rRNA processing and 60S ribosome biogenesis (18,19). While largely uncharacterized, Syh1 co-purifies with ribosomes (20), suggesting that it too functions in translation or ribosome assembly. *SYH1* also displays genetic interaction with *EBP2*, encoding a protein involved in 60S biogenesis. The identification of Nop2 and Syh1 are consistent with our previous observation that *vtc4Δ* cells show defects in polysome formation and the previous identification of negative genetic interactions between *vtc4Δ* mutants and deletions of genes impacting ribosome biogenesis (*RPP1A*, *MAK11*, and *RPC25*) and translation (*ELP3*, *ELP6*, and *MNR1*) (21,22). Our expanded target list also included a number of proteins

associated with vacuolar biology. Prb1 encodes the yeast vacuolar proteinase B (23). Apl5 is involved in transporting protein cargo from the ER-golgi system to the vacuole (24). Since the vast majority of polyP localizes to the vacuole in *S. cerevisiae*, these proteins are ideal candidate effectors of polyP-mediated signaling. Therefore, we carried out further experiments to validate the polyphosphorylation of these new targets and to determine amino acid sequences required for the modification.

We first sought to confirm that the electrophoretic shift detected for Prb1-GFP in the presence of *VTC4* was due to polyP. Since polyphosphorylation occurs non-enzymatically even in harsh conditions (7), we added synthetic polyP of 75 units in length to *vtc4Δ* whole-cell protein extracts generated via a trichloroacetic acid (TCA) lysis protocol. Addition of 5 mM of polyP conferred an electrophoretic shift to Prb1-GFP in *vtc4Δ* extracts that was equal to the shift observed in the wild-type control. In contrast, the same concentration of sodium phosphate had no impact on the mobility of Prb1-GFP, confirming that polyP is required for the modification (**Figure 3A**).

The Prb1 protease is a heavily processed protein that undergoes a series of glycosylations and programmed cleavages to convert the zymogen precursor (pre-pro) form to the fully active enzyme (mPrb1) (25). Processing occurs in step with its transit through the ER-golgi system to the vacuole (**Figure 3B & C**). Since the C-terminal GFP tag of Prb1-GFP is predicted to be removed during its processing, **Figures 1A** and **3A** only confirmed polyphosphorylation of pre-proPrb1. In order to study polyphosphorylation of Prb1 in the context of its processing from zymogen to active enzyme, we used a previously described galactose overexpression system (26). Induction of *PRB1* transcription with the addition of galactose, followed by addition of glucose to turn off that transcription, allowed for the production of a population of native Prb1

whose processing could be monitored over time. Following analysis by NuPAGE and western blotting, we detected Prb1 with a previously published antibody that recognizes the first 14 amino acids of the fully processed and active (mPrb1) protein (**Figure 3B**) (25). We expect this antibody to detect all forms of Prb1. Only pre-proPrb1, but not any of the processed forms, exhibited an electrophoretic shift in *VTC4* strains relative to *vtc4Δ* mutants (**Figure 3C**). As a control, the previously identified target Rts1 (9) showed polyphosphorylation throughout the time course in *VTC4* cells (**Supporting Figure 1A**). These data suggest that the P1 segment of Prb1, which is removed by the Pep4 protease in the first cleavage event within the endoplasmic reticulum (25), is the modified species. Indeed, the predicted PASK motif is located in the P1 fragment, as indicated in **Figure 3B**. Importantly, analysis of these same samples via traditional SDS-PAGE, which does resolve polyP-induced shifts (9), showed identical migration of all species, consistent with the electrophoretic shift being due to polyphosphorylation (**Supporting Figure 1B**). In this analysis, we also observed slightly delayed processing of Prb1 in *vtc4Δ* mutants, although it is unclear if this is biologically meaningful (**Supporting Figure 1B**).

Polyphosphorylation of the P1 fragment may be required to ensure early processing steps occur in a manner consistent with the production of an active mPrb1 protein. In this capacity, polyP may function redundantly or in coordination with other PTMs, including glycosylations. Alternatively, polyP may function in a quality control capacity to regulate the function or degradation of Prb1 that is improperly processed by the ER-golgi system. A similar role has been suggested for the SCF<sup>Saf1</sup> ubiquitin ligase, which ubiquitylates Prb1 but does not impact the bulk turnover of the protein population (26,27). The hypothesis that polyP modulates protein stability is consistent with its previously described role as a molecular chaperone in other biological systems (28).

Apl5, the second vacuole-related protein uncovered in our screen, functions as a member of the conserved AP3 complex. AP3 selectively transports protein cargo from the Golgi to lysosome-related organelles such as the yeast vacuole (29,30). As with Prb1-GFP, Apl5-GFP polyphosphorylation was rescued by the addition of polyP to *vtc4Δ* extracts in a concentration-dependent manner (**Figure 4A**). Other subunits of AP3 were not polyphosphorylated (**Figure 4B**), suggesting that Apl5 may be a focal point for AP3 regulation by polyP. As predicted, the PASK motif of Apl5 is required for the electrophoretic shift observed in *VTC4* strains (**Figure 4C**). This PASK motif is located in the ‘ear domain’ of the protein (**Figure 4D**), previously demonstrated to be required for interaction with AP3 regulators such as Vps41 (24,31). This interaction occurs when Vps41 is integrated into the HOPS complex, and is thought to be required for AP3 docking to the vacuole membrane, which allows proper delivery of vacuolar cargo (24). The other large subunit of the AP3 complex, Apl6, also has a PASK motif (9), although we did not detect reproducible *Vtc4*-dependent electrophoretic shifts of this protein on NuPAGE gels (**Figure 4B**). Notably, Apl6 only has 2 lysines in its PASK motif, compared to 12 for Apl5 (**Supporting Figure 2A**). Since we previously found that electrophoretic shifts due to polyphosphorylation scale in proportion to the number of lysines in the PASK motif (9), it is possible that Apl6 polyphosphorylation is not easily detected via this method.

AP3 mutant strains were previously described as having low levels of polyP (32). AP3 could impact polyP synthesis by transporting proteins involved in polyP synthesis or storage to the vacuole (32-34). In the context of this model, polyphosphorylation of AP3 may serve as means of feedback to regulate AP3 function. Importantly, the impact of AP3 on polyP metabolism could be mediated by multiple cargos, as over 200 genes are known to impact polyP synthesis in *S. cerevisiae* (32). In humans, mutations in the AP3 $\beta$  and AP3 $\delta$  subunits of the AP3



complex, homologs of Apl6 and Apl5 respectively (**Figure 4D**)(29), give rise to Hermansky-Pudlak Syndrome (HPS) subtypes 2 and 10 (35-37). HPS is a pleiotropic disease characterized by defects in the transport of proteins to lysosome related-organelles (38,39). Notably, a hallmark of HPS is bleeding diathesis and a failure to accumulate or retain polyP in the dense granules of platelets (38,39). PolyP has a well-characterized role in the blood coagulation cascade and works by stimulating activation of several clotting factors (14). AP3 $\beta$ 1, AP3 $\beta$ 2 and AP3 $\delta$  also have PASK motifs as defined by our criteria (**Supporting Figure 2B**), and Azevedo et al. provided evidence that AP3 $\beta$ 1 can be polyphosphorylated (13). Direct regulation by polyP may be a conserved feature of AP3 biology.

Altogether, our work expands the scope of polyphosphorylation in yeast and provides new avenues for exploring the functional consequences of this intriguing post-translational modification. Expanding the catalog of polyphosphorylated proteins in other eukaryotes will be a critical step in understanding the molecular and cellular functions of polyP in these systems.

## **METHODS:**

### ***Yeast strains:***

All strains are in the S288C background and were generated using standard methods. Strains were verified using PCR to confirm the presence of the knockout cassette and the absence of the wild-type open reading frame. This analysis was also done for strains streaked or generated from strains taken from the GFP-tagged set. Strain confirmations were always done on colony-purified isolates, whose genotypes are described in **Supporting Table 1**. Details of individual strain constructions, including oligonucleotides used for tagging, deletion or confirmations, are available upon request. For the GAL shut-off experiment used to examine Prb1 processing, wild-type *GALpr-PRB1* and *GALpr-PRB1 vtc4Δ* mutant strains were grown in synthetic complete (SC) media with 2 % raffinose overnight. Cells were diluted to OD<sub>600</sub> = 0.3 in SC media with 2 % raffinose and grown until OD<sub>600</sub> = 0.6. Cultures were then supplemented with 2 % galactose for 30 minutes to induce Prb1 expression. Subsequently, glucose was added to a final concentration of 2 % and time points were taken every 15 minutes. For all other experiments, cells were grown in YPD media supplemented with 0.005 % adenine and tryptophan. All strains were grown at 30 °C.

### ***Screening protocol:***

Candidate target strains were recovered from the yeast GFP-tagged collection and the *vtc4Δ* and *ppn1Δ* mutations were crossed into the strains as previously described (9). Paired protein extracts were generated and analyzed using NuPAGE analysis following preparation of protein extracts via TCA lysis (see below). Rts1 was used as control for a polyphosphorylated protein for each sample analyzed. Candidates were confirmed in a secondary screen before streaking strains for single colonies and confirming the correct position of the GFP tag. As described throughout the

results section, select hits were reconfirmed by re-tagging candidates in various genetic backgrounds and/or with the use of antibodies directed against native targets. A list of screened targets and their predicted PASK motifs is included in **Supporting Table 1**.

***Protein analysis:***

Protein extraction was done using a TCA lysis method that has been described previously (9). A similar protocol is reiterated here. Briefly, 3-6 OD600 equivalents of yeast cells were lysed in 300  $\mu$ L of 20 % TCA with 100  $\mu$ L of acid-washed glass beads. Supernatant was recovered and beads were washed with 300  $\mu$ L of 5 % TCA and combined with the first supernatant. Samples were centrifuged at 16,000 x g for 4 minutes at 4  $^{\circ}$ C. Pellets were resuspended in 100  $\mu$ L SDS-PAGE sample buffer (0.8 mL 3X SDS PAGE sample buffer, 100  $\mu$ L 1.5 M Tris-HCl pH 8.8, 100  $\mu$ L 1 M DTT). Samples were boiled for 5 minutes and centrifuged again at 16,000 x g for 4 minutes. Supernatant was removed for immediate analysis or stored at -80  $^{\circ}$ C until use.

Typically, 10-20  $\mu$ L of extract was loaded for each lane. We have observed that protein samples tend to lose their polyphosphorylation after multiple freeze thaw cycles. We recommend same-day analysis of extracted proteins.

***Western blotting:***

Buffers used for NuPAGE and SDS-PAGE analysis were described previously (9). SDS-PAGE gels used for this work were 10 % final concentration made with 30 % acrylamide/bis solution at a ratio of 37.5:1 (BioRad 1610158). Please note that SDS-PAGE analysis does not resolve polyP-induced shifts. PVDF membrane (Biorad 162-0177) was used for Western blotting of separated protein samples. Primary and secondary antibodies used for immunoblotting, including dilution information for each antibody, is described in **Supporting Table 2**. Washed blots were exposed to ECL from Millipore (Sigma WBKLS0500 or WBLUF0500). Ponceau S (Sigma P-

3504) was used to verify equal loading across the blots and to monitor the quality of transfer for each blot.

***Homologs and Network analysis:***

Homologs were determined via the Yeastmine tool (40). Genetic networks were generated using Genemania ([genemania.org](http://genemania.org); June 12, 2019) (41). Gene attributes were set to zero, only genetic and physical interactions were computed and shown, all other settings were left as default. FDR displayed was as calculated for nucleolar localization by the Genemania tool.

***In vitro polyphosphorylation assays:***

*In vitro* polyphosphorylation assays were carried out by mixing the indicated concentrations of polyP with TCA-style protein preps, incubation at room temperature for 30 minutes before re-boiling of reactions and NuPAGE analysis, as described above. PolyP chains used for this analysis are an average of 75 residues in length and were purchased from Kerafast (Medium chain, EUI005).

### **ACKNOWLEDGEMENTS:**

We thank the members of the Downey lab for critical reading of the manuscript and the Dr. Elizabeth Jones' lab for the anti-Prb1 antibody. ABD was supported by an Ontario Graduate Scholarship. This work was funded by a Canadian Institutes of Health Research Project Grant to MD (PJT-148722). We also acknowledge funding from a Rare Disease Foundation Microgrant (grant number 1937).

### **CONFLICTS OF INTEREST:**

The authors declare no conflicts of interest.

## FIGURES & LEGENDS:

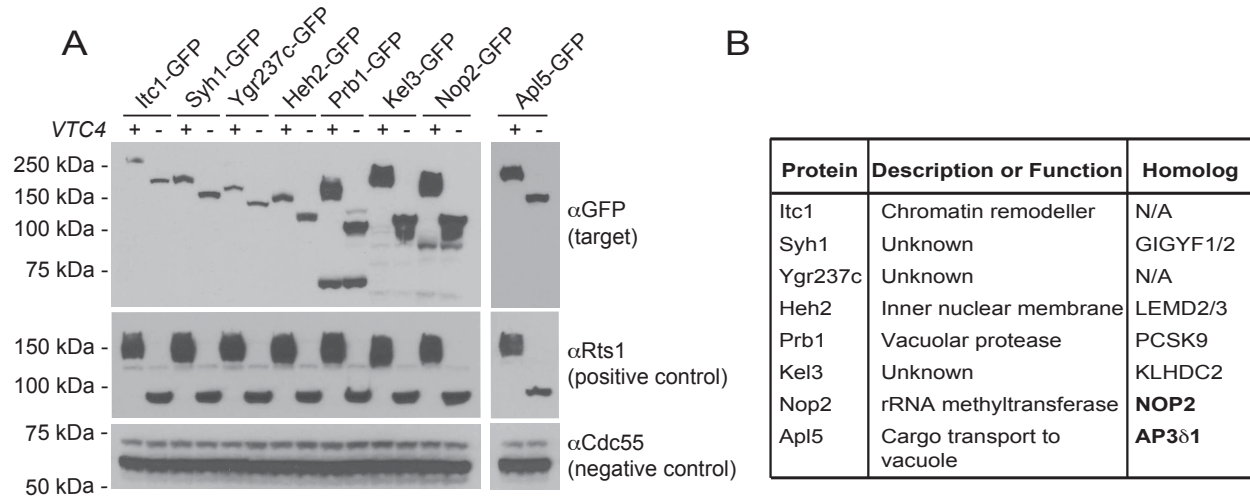

**Figure 1 - Identification of new polyphosphorylated targets in yeast. A)** NuPAGE analysis of polyphosphorylated proteins. Paired GFP-tagged proteins were extracted from wild-type or *vtc4Δ* mutant cells using TCA lysis prior to NuPAGE analysis, western blotting to PVDF membrane and detection using the indicated antibodies. Rts1 serves as a positive control. Cdc55 serves as a negative control. **B)** Table of new polyphosphorylated targets uncovered in this study. Human homologs were determined using the Yeastmine tool. Bold indicates presence of a PASK sequence in human homolog (as defined by Bentley-DeSousa *et al.* 2018).

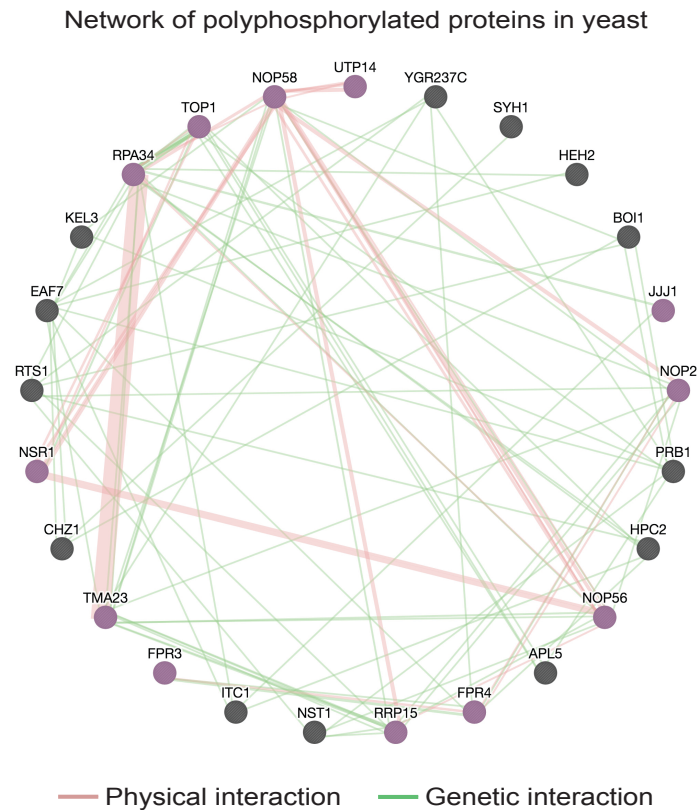

**Figure 2 - Polyphosphorylated targets are connected by genetic and physical interactions.** Genetic and physical associations between new and previously identified targets were computed using the Genemania tool (see Materials and Methods). Each node (circle) represents an individual polyphosphorylated protein ( $n = 22$ ). Physical and genetic interactions are indicated with green and pink lines respectively. Purple nodes indicate localization to the nucleolus ( $n = 12$ ;  $FDR = 1.85 \times 10^{-7}$ ).

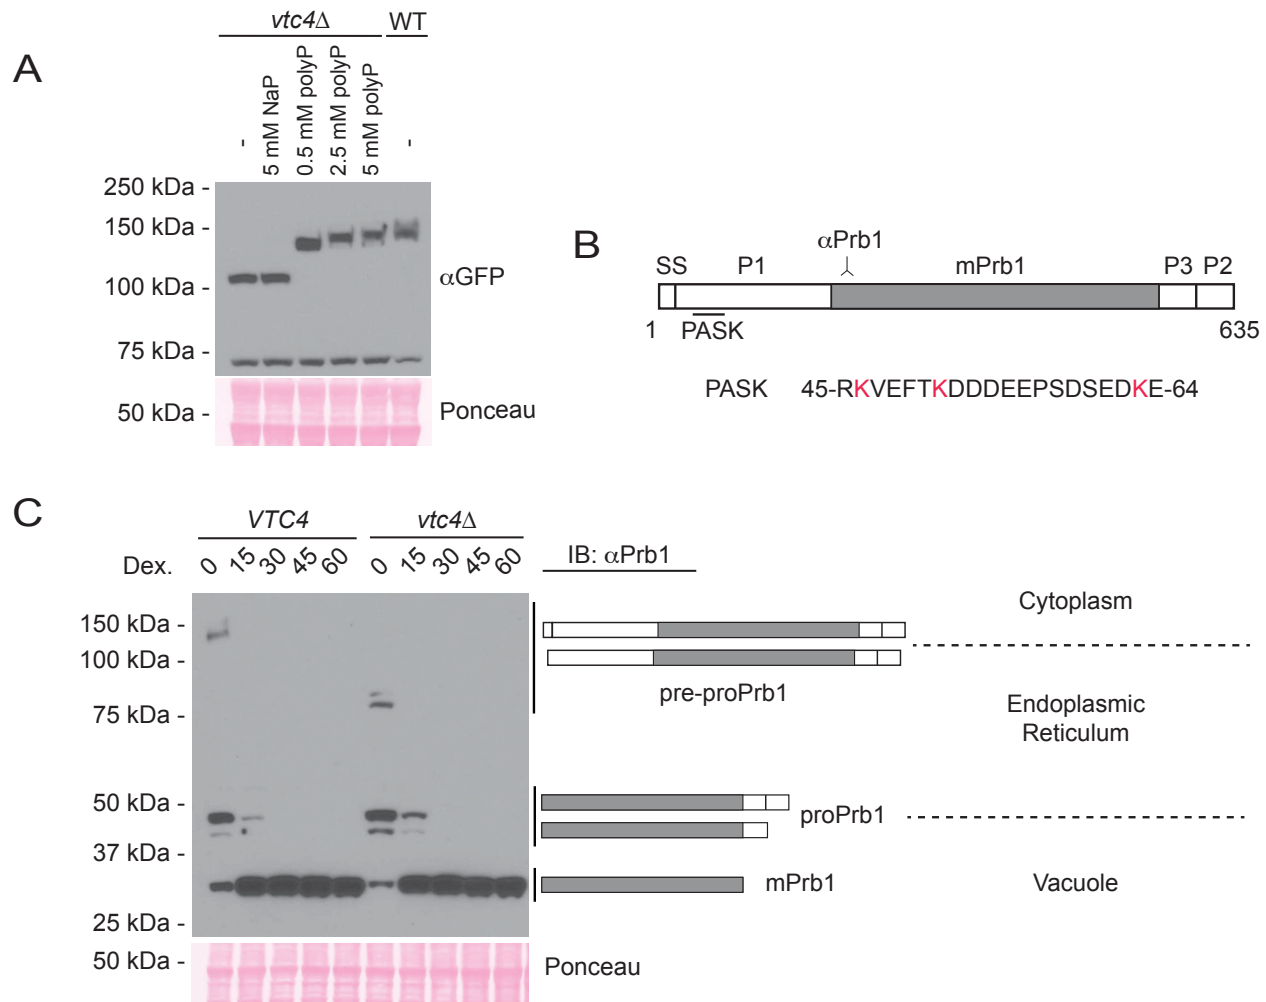

**Figure 3 - Analysis of Prb1 polyphosphorylation.** **A)** Indicated concentrations of polyP or sodium phosphate control were added to *vtc4Δ* mutant cell extracts expressing GFP-tagged Prb1 and polyP-induced shifts were analyzed by western blotting with an antibody against GFP after NuPAGE analysis. **B)** Schematic of inactive pre-pro form of Prb1. The region recognized by the antibody is shown. Red lysines indicate candidate sites for polyP attachment. **C)** Prb1 was expressed under the GAL promoter (see Materials & Methods) for 2 hours prior to addition of glucose to stop transcription. Processing and polyphosphorylation of Prb1 at the indicated time points was monitored via NuPAGE analysis. The proposed schematic for Prb1 processing indicated on the right was adapted from that proposed in Mark *et al.* 2015 (27).





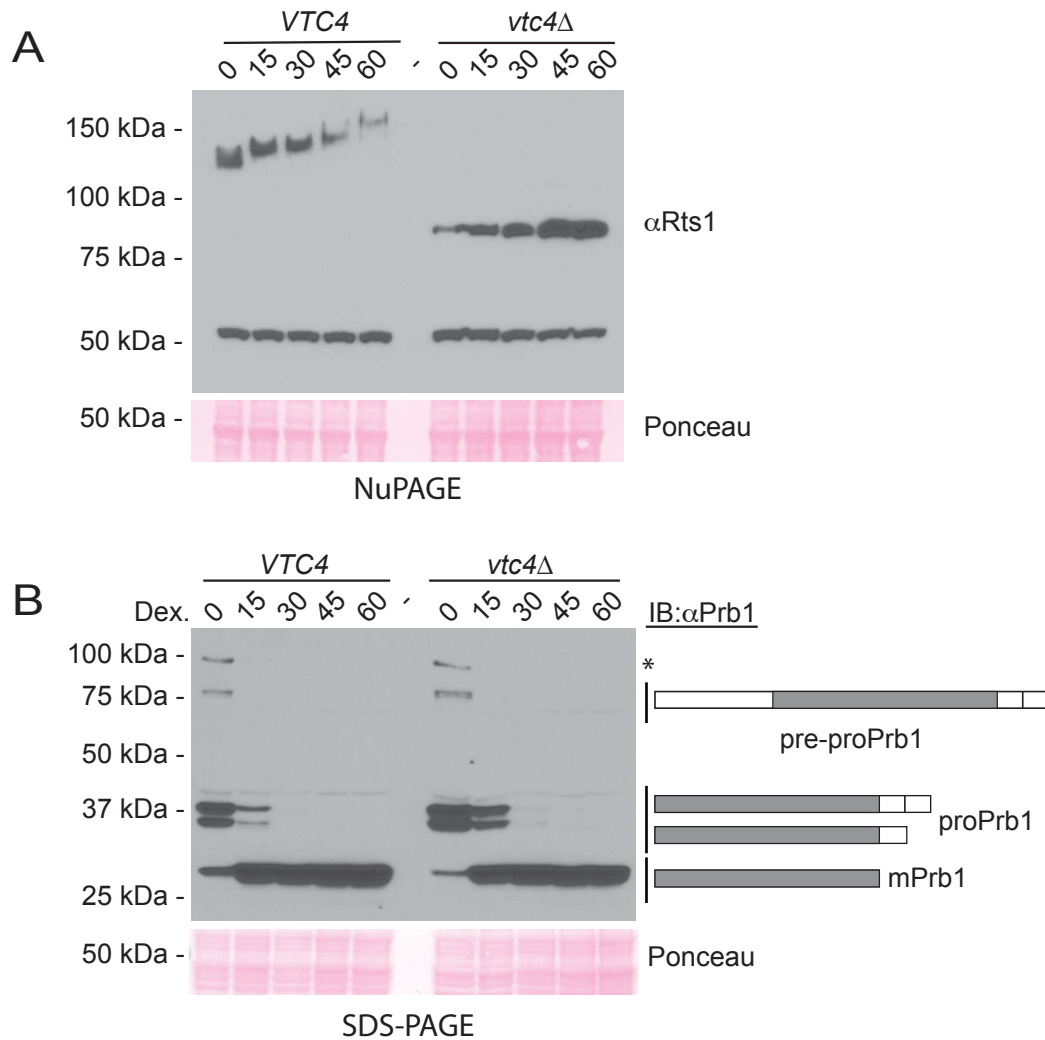

**Supplementary Figure 1 – Analysis of Prb1 processing and polyphosphorylation. A)** Polyphosphorylation of Rts1 was monitored during the experiment presented in Figure 4C using an antibody against Rts1. **B)** Processing of pre-pro Prb1 was monitored for the experiment presented in Figure 4C using SDS-PAGE and immunoblotting with an antibody against Prb1. Note: SDS-PAGE does not resolve shifts due to lysine polyphosphorylation. \* may represent a previously uncharacterized form of Prb1. **Relates to Figure 3.**

**A** Apl5 897- **KKKKKGKKSKSKNKLKTKAK** -916

Apl6 764- **RKIIKVVEESSDEDEDESEESSDDDEYSDSSLG** -796

**B** AP3 $\delta$ 1 831- **EKDVP MVEKKS KKP KKK EK KH KEKERDKEK** | Apl5  
**KKEKE KKK SPKP KKK KHRKEKEERTKGKKK** | homolog  
**SKKQPPGSEEA** -901

AP3 $\beta$ 1 667- **KQENSAK KFYSESEEEEEEDSSDSSSDSESE** |  
**SGSESGEQGESGEEGDS** -712 | Apl6  
AP3 $\beta$ 1 743- **NSKAKG KSDSEGEKENEKSKTSDSSNDE** | homolog  
**SSSIEDSSSDSESESEPESESESRRVTKEK**  
**EKKTKQDRT** -810

AP3 $\beta$ 2 685- **NSKAKG KSDSEGEKENEKSKTSDSSNDE** |  
**SSSIEDSSSDSESESEPESESESRRVTKEK** | Apl6  
**EKKTKQDRT** -745 | homolog  
AP3 $\beta$ 2 751- **PERKGEASSSDEGSDSSSSSSSESEM** -775

**Supplementary Figure 2 – PASK sequences within the AP3 complex. A)** PASK sequences of Apl5 and Apl6. Numbers indicate amino acid positions. **B)** PASK sequences of AP3 $\beta$  and AP3 $\delta$ . Numbers indicate amino acid positions. **Relates to Figure 4.**

**SUPPORTING TABLES: (Provided in a single excel sheet):**

**Supporting Table 1** - PASK containing proteins screened for polyphosphorylation in this study.

**Supporting Table 2** - Yeast strains used in this study.

**Supporting Table 3** - Antibodies used in this study.

## REFERENCES:

1. Auesukaree, C., Homma, T., Tochio, H., Shirakawa, M., Kaneko, Y., and Harashima, S. (2004) Intracellular phosphate serves as a signal for the regulation of the PHO pathway in *Saccharomyces cerevisiae*. *J Biol Chem* **279**, 17289-17294
2. Kornberg, A., Rao, N. N., and Ault-Riche, D. (1999) Inorganic polyphosphate: a molecule of many functions. *Annu Rev Biochem* **68**, 89-125
3. Gerasimaite, R., Sharma, S., Desfougeres, Y., Schmidt, A., and Mayer, A. (2014) Coupled synthesis and translocation restrains polyphosphate to acidocalcisome-like vacuoles and prevents its toxicity. *J Cell Sci* **127**, 5093-5104
4. Gerasimaite, R., and Mayer, A. (2017) Ppn2, a novel Zn(2+)-dependent polyphosphatase in the acidocalcisome-like yeast vacuole. *J Cell Sci* **130**, 1625-1636
5. Eskes, E., Deprez, M. A., Wilms, T., and Winderickx, J. (2018) pH homeostasis in yeast; the phosphate perspective. *Curr Genet* **64**, 155-161
6. Rosenfeld, L., Reddi, A. R., Leung, E., Aranda, K., Jensen, L. T., and Culotta, V. C. (2010) The effect of phosphate accumulation on metal ion homeostasis in *Saccharomyces cerevisiae*. *J Biol Inorg Chem* **15**, 1051-1062
7. Azevedo, C., Livermore, T., and Saiardi, A. (2015) Protein polyphosphorylation of lysine residues by inorganic polyphosphate. *Mol Cell* **58**, 71-82
8. Azevedo, C., and Saiardi, A. (2015) Why always lysine? The ongoing tale of one of the most modified amino acids. *Adv Biol Regul*
9. Bentley-DeSousa, A., Holinier, C., Moteshareie, H., Tseng, Y. C., Kajjo, S., Nwosu, C., Amodeo, G. F., Bondy-Chorney, E., Sai, Y., Rudner, A., Golshani, A., Davey, N. E., and Downey, M. (2018) A Screen for Candidate Targets of Lysine Polyphosphorylation Uncovers a Conserved Network Implicated in Ribosome Biogenesis. *Cell Rep* **22**, 3427-3439
10. Azevedo, C., and Saiardi, A. (2016) The new world of inorganic polyphosphates. *Biochem Soc Trans* **44**, 13-17
11. Zarin, T., Strome, B., Nguyen Ba, A. N., Alberti, S., Forman-Kay, J. D., and Moses, A. M. (2019) Proteome-wide signatures of function in highly diverged intrinsically disordered regions. *Elife* **8**
12. Hothorn, M., Neumann, H., Lenherr, E. D., Wehner, M., Rybin, V., Hassa, P. O., Uttenweiler, A., Reinhardt, M., Schmidt, A., Seiler, J., Ladurner, A. G., Herrmann, C., Scheffzek, K., and Mayer, A. (2009) Catalytic core of a membrane-associated eukaryotic polyphosphate polymerase. *Science* **324**, 513-516
13. Azevedo, C., Singh, J., Steck, N., Hofer, A., Ruiz, F. A., Singh, T., Jessen, H. J., and Saiardi, A. (2018) Screening a Protein Array with Synthetic Biotinylated Inorganic Polyphosphate To Define the Human PolyP-ome. *ACS Chem Biol* **13**, 1958-1963
14. Bentley-DeSousa, A., and Downey, M. (2018) From underlying chemistry to therapeutic potential: open questions in the new field of lysine polyphosphorylation. *Curr Genet*
15. Huh, W. K., Falvo, J. V., Gerke, L. C., Carroll, A. S., Howson, R. W., Weissman, J. S., and O'Shea, E. K. (2003) Global analysis of protein localization in budding yeast. *Nature* **425**, 686-691
16. Webster, B. M., Colombi, P., Jager, J., and Lusk, C. P. (2014) Surveillance of nuclear pore complex assembly by ESCRT-III/Vps4. *Cell* **159**, 388-401

17. Sugiyama, M., and Nikawa, J. (2001) The *Saccharomyces cerevisiae* Isw2p-Itc1p complex represses INO1 expression and maintains cell morphology. *J Bacteriol* **183**, 4985-4993
18. Hong, B., Brockenbrough, J. S., Wu, P., and Aris, J. P. (1997) Nop2p is required for pre-rRNA processing and 60S ribosome subunit synthesis in yeast. *Mol Cell Biol* **17**, 378-388
19. Sharma, S., Yang, J., Watzinger, P., Kotter, P., and Entian, K. D. (2013) Yeast Nop2 and Rcm1 methylate C2870 and C2278 of the 25S rRNA, respectively. *Nucleic Acids Res* **41**, 9062-9076
20. Fleischer, T. C., Weaver, C. M., McAfee, K. J., Jennings, J. L., and Link, A. J. (2006) Systematic identification and functional screens of uncharacterized proteins associated with eukaryotic ribosomal complexes. *Genes Dev* **20**, 1294-1307
21. Chatr-Aryamontri, A., Oughtred, R., Boucher, L., Rust, J., Chang, C., Kolas, N. K., O'Donnell, L., Oster, S., Theesfeld, C., Sellam, A., Stark, C., Breitkreutz, B. J., Dolinski, K., and Tyers, M. (2017) The BioGRID interaction database: 2017 update. *Nucleic Acids Res* **45**, D369-D379
22. Costanzo, M., VanderSluis, B., Koch, E. N., Baryshnikova, A., Pons, C., Tan, G., Wang, W., Usaj, M., Hanchard, J., Lee, S. D., Pelechano, V., Styles, E. B., Billmann, M., van Leeuwen, J., van Dyk, N., Lin, Z. Y., Kuzmin, E., Nelson, J., Piotrowski, J. S., Srikumar, T., Bahr, S., Chen, Y., Deshpande, R., Kurat, C. F., Li, S. C., Li, Z., Usaj, M. M., Okada, H., Pascoe, N., San Luis, B. J., Sharifpoor, S., Shuteriqi, E., Simpkins, S. W., Snider, J., Suresh, H. G., Tan, Y., Zhu, H., Malod-Dognin, N., Janjic, V., Przulj, N., Troyanskaya, O. G., Stagljar, I., Xia, T., Ohya, Y., Gingras, A. C., Raught, B., Boutros, M., Steinmetz, L. M., Moore, C. L., Rosebrock, A. P., Cauchy, A. A., Myers, C. L., Andrews, B., and Boone, C. (2016) A global genetic interaction network maps a wiring diagram of cellular function. *Science* **353**
23. Moehle, C. M., Aynardi, M. W., Kolodny, M. R., Park, F. J., and Jones, E. W. (1987) Protease B of *Saccharomyces cerevisiae*: isolation and regulation of the PRB1 structural gene. *Genetics* **115**, 255-263
24. Angers, C. G., and Merz, A. J. (2009) HOPS interacts with Apl5 at the vacuole membrane and is required for consumption of AP-3 transport vesicles. *Mol Biol Cell* **20**, 4563-4574
25. Moehle, C. M., Dixon, C. K., and Jones, E. W. (1989) Processing pathway for protease B of *Saccharomyces cerevisiae*. *J Cell Biol* **108**, 309-325
26. Mark, K. G., Simonetta, M., Maiolica, A., Seller, C. A., and Toczyski, D. P. (2014) Ubiquitin ligase trapping identifies an SCF(Saf1) pathway targeting unprocessed vacuolar/lysosomal proteins. *Mol Cell* **53**, 148-161
27. Mark, K. G., Meza-Gutierrez, F., Johnson, J. R., Newton, B. W., Krogan, N. J., and Toczyski, D. P. (2015) Prb1 Protease Activity Is Required for Its Recognition by the F-Box Protein Saf1. *Biochemistry* **54**, 4423-4426
28. Gray, M. J., Wholey, W. Y., Wagner, N. O., Cremers, C. M., Mueller-Schickert, A., Hock, N. T., Krieger, A. G., Smith, E. M., Bender, R. A., Bardwell, J. C., and Jakob, U. (2014) Polyphosphate is a primordial chaperone. *Mol Cell* **53**, 689-699
29. Cowles, C. R., Odorizzi, G., Payne, G. S., and Emr, S. D. (1997) The AP-3 adaptor complex is essential for cargo-selective transport to the yeast vacuole. *Cell* **91**, 109-118
30. Odorizzi, G., Cowles, C. R., and Emr, S. D. (1998) The AP-3 complex: a coat of many colours. *Trends Cell Biol* **8**, 282-288

31. Rehling, P., Darsow, T., Katzmann, D. J., and Emr, S. D. (1999) Formation of AP-3 transport intermediates requires Vps41 function. *Nat Cell Biol* **1**, 346-353
32. Freimoser, F. M., Hurlimann, H. C., Jakob, C. A., Werner, T. P., and Amrhein, N. (2006) Systematic screening of polyphosphate (poly P) levels in yeast mutant cells reveals strong interdependence with primary metabolism. *Genome Biol* **7**, R109
33. Besteiro, S., Tonn, D., Tetley, L., Coombs, G. H., and Mottram, J. C. (2008) The AP3 adaptor is involved in the transport of membrane proteins to acidocalcisomes of *Leishmania*. *J Cell Sci* **121**, 561-570
34. Huang, G., Fang, J., Sant'Anna, C., Li, Z. H., Wellems, D. L., Rohloff, P., and Docampo, R. (2011) Adaptor protein-3 (AP-3) complex mediates the biogenesis of acidocalcisomes and is essential for growth and virulence of *Trypanosoma brucei*. *J Biol Chem* **286**, 36619-36630
35. Wenham, M., Grieve, S., Cummins, M., Jones, M. L., Booth, S., Kilner, R., Ancliff, P. J., Griffiths, G. M., and Mumford, A. D. (2010) Two patients with Hermansky Pudlak syndrome type 2 and novel mutations in AP3B1. *Haematologica* **95**, 333-337
36. Mohammed, M., Al-Hashmi, N., Al-Rashdi, S., Al-Sukaiti, N., Al-Adawi, K., Al-Riyami, M., and Al-Maawali, A. (2018) Biallelic mutations in AP3D1 cause Hermansky-Pudlak syndrome type 10 associated with immunodeficiency and seizure disorder. *Eur J Med Genet*
37. Ammann, S., Schulz, A., Krageloh-Mann, I., Dieckmann, N. M., Niethammer, K., Fuchs, S., Eckl, K. M., Plank, R., Werner, R., Altmüller, J., Thiele, H., Nurnberg, P., Bank, J., Strauss, A., von Bernuth, H., Zur Stadt, U., Grieve, S., Griffiths, G. M., Lehmsberg, K., Hennies, H. C., and Ehl, S. (2016) Mutations in AP3D1 associated with immunodeficiency and seizures define a new type of Hermansky-Pudlak syndrome. *Blood* **127**, 997-1006
38. Huizing, M., Anikster, Y., and Gahl, W. A. (2000) Hermansky-Pudlak syndrome and related disorders of organelle formation. *Traffic* **1**, 823-835
39. Huizing, M., Boissy, R. E., and Gahl, W. A. (2002) Hermansky-Pudlak syndrome: vesicle formation from yeast to man. *Pigment Cell Res* **15**, 405-419
40. Balakrishnan, R., Park, J., Karra, K., Hitz, B. C., Binkley, G., Hong, E. L., Sullivan, J., Micklem, G., and Cherry, J. M. (2012) YeastMine--an integrated data warehouse for *Saccharomyces cerevisiae* data as a multipurpose tool-kit. *Database (Oxford)* **2012**, bar062
41. Warde-Farley, D., Donaldson, S. L., Comes, O., Zuberi, K., Badrawi, R., Chao, P., Franz, M., Grouios, C., Kazi, F., Lopes, C. T., Maitland, A., Mostafavi, S., Montojo, J., Shao, Q., Wright, G., Bader, G. D., and Morris, Q. (2010) The GeneMANIA prediction server: biological network integration for gene prioritization and predicting gene function. *Nucleic Acids Res* **38**, W214-220
